# Supplementary material for: Methodological challenges and potential solutions for economic evaluations of palliative and end-of-life care: A systematic review
Source: PubMed Central journal article supplement (PMC10798028; doi:10.1177/02692163231214124), 2023-12-23
Supplement: sj-pdf-1-pmj-10.1177_02692163231214124.pdf [file sj-pdf-1-pmj-10.1177_02692163231214124.pdf]

## APPENDIX

**Table1.** PRISMA 2020 checklist

| Section and Topic       | Item # | Checklist item                                                                                                                                                                                                                                                                                       | Location where item is reported |
|-------------------------|--------|------------------------------------------------------------------------------------------------------------------------------------------------------------------------------------------------------------------------------------------------------------------------------------------------------|---------------------------------|
| <b>TITLE</b>            |        |                                                                                                                                                                                                                                                                                                      |                                 |
| Title                   | 1      | Identify the report as a systematic review.                                                                                                                                                                                                                                                          | 1                               |
| <b>ABSTRACT</b>         |        |                                                                                                                                                                                                                                                                                                      |                                 |
| Abstract                | 2      | See the PRISMA 2020 for Abstracts checklist.                                                                                                                                                                                                                                                         | 3                               |
| <b>INTRODUCTION</b>     |        |                                                                                                                                                                                                                                                                                                      |                                 |
| Rationale               | 3      | Describe the rationale for the review in the context of existing knowledge.                                                                                                                                                                                                                          | 4, 5                            |
| Objectives              | 4      | Provide an explicit statement of the objective(s) or question(s) the review addresses.                                                                                                                                                                                                               | 5                               |
| <b>METHODS</b>          |        |                                                                                                                                                                                                                                                                                                      |                                 |
| Eligibility criteria    | 5      | Specify the inclusion and exclusion criteria for the review and how studies were grouped for the syntheses.                                                                                                                                                                                          | 6                               |
| Information sources     | 6      | Specify all databases, registers, websites, organisations, reference lists and other sources searched or consulted to identify studies. Specify the date when each source was last searched or consulted.                                                                                            | 6                               |
| Search strategy         | 7      | Present the full search strategies for all databases, registers and websites, including any filters and limits used.                                                                                                                                                                                 | 6, Appendix                     |
| Selection process       | 8      | Specify the methods used to decide whether a study met the inclusion criteria of the review, including how many reviewers screened each record and each report retrieved, whether they worked independently, and if applicable, details of automation tools used in the process.                     | 7                               |
| Data collection process | 9      | Specify the methods used to collect data from reports, including how many reviewers collected data from each report, whether they worked independently, any processes for obtaining or confirming data from study investigators, and if applicable, details of automation tools used in the process. | 7                               |
| Data items              | 10a    | List and define all outcomes for which data were sought. Specify whether all results that were compatible with each outcome domain in each study were sought (e.g. for all measures, time points, analyses), and if not, the methods used to decide which results to collect.                        | 7                               |

| Section and Topic             | Item # | Checklist item                                                                                                                                                                                                                                                    | Location where item is reported |
|-------------------------------|--------|-------------------------------------------------------------------------------------------------------------------------------------------------------------------------------------------------------------------------------------------------------------------|---------------------------------|
|                               | 10b    | List and define all other variables for which data were sought (e.g. participant and intervention characteristics, funding sources). Describe any assumptions made about any missing or unclear information.                                                      | 7                               |
| Study risk of bias assessment | 11     | Specify the methods used to assess risk of bias in the included studies, including details of the tool(s) used, how many reviewers assessed each study and whether they worked independently, and if applicable, details of automation tools used in the process. | 7                               |
| Effect measures               | 12     | Specify for each outcome the effect measure(s) (e.g. risk ratio, mean difference) used in the synthesis or presentation of results.                                                                                                                               | 7                               |
| Synthesis methods             | 13a    | Describe the processes used to decide which studies were eligible for each synthesis (e.g. tabulating the study intervention characteristics and comparing against the planned groups for each synthesis (item #5)).                                              | 7                               |
|                               | 13b    | Describe any methods required to prepare the data for presentation or synthesis, such as handling of missing summary statistics, or data conversions.                                                                                                             | n.a.                            |
|                               | 13c    | Describe any methods used to tabulate or visually display results of individual studies and syntheses.                                                                                                                                                            | 7                               |
|                               | 13d    | Describe any methods used to synthesize results and provide a rationale for the choice(s). If meta-analysis was performed, describe the model(s), method(s) to identify the presence and extent of statistical heterogeneity, and software package(s) used.       | 7                               |
|                               | 13e    | Describe any methods used to explore possible causes of heterogeneity among study results (e.g. subgroup analysis, meta-regression).                                                                                                                              | n.a.                            |
|                               | 13f    | Describe any sensitivity analyses conducted to assess robustness of the synthesized results.                                                                                                                                                                      | n.a.                            |
| Reporting bias assessment     | 14     | Describe any methods used to assess risk of bias due to missing results in a synthesis (arising from reporting biases).                                                                                                                                           | n.a.                            |
| Certainty assessment          | 15     | Describe any methods used to assess certainty (or confidence) in the body of evidence for an outcome.                                                                                                                                                             | n.a.                            |
| <b>RESULTS</b>                |        |                                                                                                                                                                                                                                                                   |                                 |
| Study selection               | 16a    | Describe the results of the search and selection process, from the number of records identified in the search to the number of studies included in the review, ideally using a flow diagram.                                                                      | 8                               |
|                               | 16b    | Cite studies that might appear to meet the inclusion criteria, but which were excluded, and explain why they were                                                                                                                                                 | Figure 1                        |

| Section and Topic             | Item # | Checklist item                                                                                                                                                                                                                                                                       | Location where item is reported |
|-------------------------------|--------|--------------------------------------------------------------------------------------------------------------------------------------------------------------------------------------------------------------------------------------------------------------------------------------|---------------------------------|
|                               |        | excluded.                                                                                                                                                                                                                                                                            |                                 |
| Study characteristics         | 17     | Cite each included study and present its characteristics.                                                                                                                                                                                                                            | Appendix, Table 4               |
| Risk of bias in studies       | 18     | Present assessments of risk of bias for each included study.                                                                                                                                                                                                                         | n.a.                            |
| Results of individual studies | 19     | For all outcomes, present, for each study: (a) summary statistics for each group (where appropriate) and (b) an effect estimate and its precision (e.g. confidence/credible interval), ideally using structured tables or plots.                                                     | n.a.                            |
| Results of syntheses          | 20a    | For each synthesis, briefly summarise the characteristics and risk of bias among contributing studies.                                                                                                                                                                               | n.a.                            |
|                               | 20b    | Present results of all statistical syntheses conducted. If meta-analysis was done, present for each the summary estimate and its precision (e.g. confidence/credible interval) and measures of statistical heterogeneity. If comparing groups, describe the direction of the effect. | n.a.                            |
|                               | 20c    | Present results of all investigations of possible causes of heterogeneity among study results.                                                                                                                                                                                       | n.a.                            |
|                               | 20d    | Present results of all sensitivity analyses conducted to assess the robustness of the synthesized results.                                                                                                                                                                           | n.a.                            |
| Reporting biases              | 21     | Present assessments of risk of bias due to missing results (arising from reporting biases) for each synthesis assessed.                                                                                                                                                              | n.a.                            |
| Certainty of evidence         | 22     | Present assessments of certainty (or confidence) in the body of evidence for each outcome assessed.                                                                                                                                                                                  | n.a.                            |
| <b>DISCUSSION</b>             |        |                                                                                                                                                                                                                                                                                      |                                 |
| Discussion                    | 23a    | Provide a general interpretation of the results in the context of other evidence.                                                                                                                                                                                                    | 20                              |
|                               | 23b    | Discuss any limitations of the evidence included in the review.                                                                                                                                                                                                                      | 21                              |
|                               | 23c    | Discuss any limitations of the review processes used.                                                                                                                                                                                                                                | 21                              |
|                               | 23d    | Discuss implications of the results for practice, policy, and future research.                                                                                                                                                                                                       | 20, 21                          |
| <b>OTHER INFORMATION</b>      |        |                                                                                                                                                                                                                                                                                      |                                 |
| Registration and protocol     | 24a    | Provide registration information for the review, including register name and registration number, or state that the review was not registered.                                                                                                                                       | 6                               |

| Section and Topic                              | Item # | Checklist item                                                                                                                                                                                                                             | Location where item is reported |
|------------------------------------------------|--------|--------------------------------------------------------------------------------------------------------------------------------------------------------------------------------------------------------------------------------------------|---------------------------------|
|                                                | 24b    | Indicate where the review protocol can be accessed, or state that a protocol was not prepared.                                                                                                                                             | 6                               |
|                                                | 24c    | Describe and explain any amendments to information provided at registration or in the protocol.                                                                                                                                            | 6                               |
| Support                                        | 25     | Describe sources of financial or non-financial support for the review, and the role of the funders or sponsors in the review.                                                                                                              | 23                              |
| Competing interests                            | 26     | Declare any competing interests of review authors.                                                                                                                                                                                         | 23                              |
| Availability of data, code and other materials | 27     | Report which of the following are publicly available and where they can be found: template data collection forms; data extracted from included studies; data used for all analyses; analytic code; any other materials used in the review. | n.a.                            |

**Table 2.** The PRISMA for Abstracts Checklist

| Section and Topic       | Item # | Checklist item                                                                                                                                                                                                                                                                                        | Reported (Yes/No)                         |
|-------------------------|--------|-------------------------------------------------------------------------------------------------------------------------------------------------------------------------------------------------------------------------------------------------------------------------------------------------------|-------------------------------------------|
| <b>TITLE</b>            |        |                                                                                                                                                                                                                                                                                                       |                                           |
| Title                   | 1      | Identify the report as a systematic review.                                                                                                                                                                                                                                                           | 2                                         |
| <b>BACKGROUND</b>       |        |                                                                                                                                                                                                                                                                                                       |                                           |
| Objectives              | 2      | Provide an explicit statement of the main objective(s) or question(s) the review addresses.                                                                                                                                                                                                           | 2                                         |
| <b>METHODS</b>          |        |                                                                                                                                                                                                                                                                                                       |                                           |
| Eligibility criteria    | 3      | Specify the inclusion and exclusion criteria for the review.                                                                                                                                                                                                                                          | 2                                         |
| Information sources     | 4      | Specify the information sources (e.g. databases, registers) used to identify studies and the date when each was last searched.                                                                                                                                                                        | 2                                         |
| Risk of bias            | 5      | Specify the methods used to assess risk of bias in the included studies.                                                                                                                                                                                                                              | 2                                         |
| Synthesis of results    | 6      | Specify the methods used to present and synthesise results.                                                                                                                                                                                                                                           | 2                                         |
| <b>RESULTS</b>          |        |                                                                                                                                                                                                                                                                                                       |                                           |
| Included studies        | 7      | Give the total number of included studies and participants and summarise relevant characteristics of studies.                                                                                                                                                                                         | 2                                         |
| Synthesis of results    | 8      | Present results for main outcomes, preferably indicating the number of included studies and participants for each. If meta-analysis was done, report the summary estimate and confidence/credible interval. If comparing groups, indicate the direction of the effect (i.e. which group is favoured). | 2                                         |
| <b>DISCUSSION</b>       |        |                                                                                                                                                                                                                                                                                                       |                                           |
| Limitations of evidence | 9      | Provide a brief summary of the limitations of the evidence included in the review (e.g. study risk of bias, inconsistency and imprecision).                                                                                                                                                           | n.a.                                      |
| Interpretation          | 10     | Provide a general interpretation of the results and important implications.                                                                                                                                                                                                                           | 2                                         |
| <b>OTHER</b>            |        |                                                                                                                                                                                                                                                                                                       |                                           |
| Funding                 | 11     | Specify the primary source of funding for the review.                                                                                                                                                                                                                                                 | Listed in referred protocol and main text |
| Registration            | 12     | Provide the register name and registration number.                                                                                                                                                                                                                                                    | 2                                         |

**Table 3.** Search syntax for Medline (OVID)

1. Palliative Care/
2. exp Terminal Care/
3. Terminally Ill/
4. palliat\*.mp.
5. (terminal\* adj6 (care or caring or ill or illness\*)). ti, ab, ot, kf.
6. (end of life or last year of life or lyol or life's end). ti, ab, ot, kf.
7. advanced cancer. ti, ab, ot, kf.
8. Hospices/
9. hospice\*.ti,ab,ot,kf.
10. bereave\*.ti,ab,ot,kf,hw.
11. 1 or 2 or 3 or 4 or 5 or 6 or 7 or 8 or 9 or 10
12. exp \*Health Care Costs/
13. ((health care or healthcare) adj3 cost\*).ti,ot,kf,kw.
14. \*'Costs and Cost Analysis'/
15. Cost-Benefit Analysis/mt [Methods]
16. exp models, economic/
17. (economic\* adj3 (evaluat\* or aspect\* or health or analy\* or model\* or framework\* or frame work\* or method\*)). ti, ab, ot, kf, hw.
18. economics. ti, ot, kf.
19. Palliative Care/ec
20. exp Terminal Care/ec
21. Hospices/ec
22. 12 or 13 or 14 or 15 or 16 or 17 or 18 or 19 or 20 or 21
23. 11 and 22
24. recycl\*.ti,hw,kf,jw.
25. (waste or life cycle assessment). jw.
26. 24 or 25
27. 23 not 26
28. limit 27 to (dutch or english or german or french or spanish)
29. limit 28 to 'all child (0 to 18 years)'
30. limit 29 to 'all adult (19 plus years)'
31. 29 not 30
32. 28 not 31
33. limit 32 to yr='1999–2023'

EMBASE.com

#33 #28 NOT #31 AND [1-1-1999]/sd NOT [07-06-2023]/sd

#32 #28 NOT #31

#31 #29 NOT #30

#30 #29 AND ([young adult]/lim OR [adult]/lim OR [middle aged]/lim OR [aged]/lim OR [very elderly]/lim)

#29 #28 AND ([adolescent]/lim OR [child]/lim OR [fetus]/lim OR [infant]/lim OR [newborn]/lim OR [preschool]/lim OR [school]/lim)

#28

#23 NOT #26 AND ([dutch]/lim OR [english]/lim OR [french]/lim OR [german]/lim OR [spanish]/lim)

#27 #23 NOT #26

#26 #24 OR #25

#25 waste:jt OR 'life cycle assessment':jt

#24 recycl\*:ti,de,kw,jt

#23 #13 AND #22

#22 #14 OR #15 OR #16 OR #17 OR #18 OR #19 OR #20 OR #21  
 #21 (('health care' OR healthcare) NEAR/3 cost\*):ti,kw  
 #20 economics:ti,kw  
 #19 (economic\* NEAR/3 (evaluat\* OR aspect\* OR health OR analy\* OR model\* OR framework\* OR 'frame work\*' OR method\*)):ti,ab,kw  
 #18 'health care cost'/exp/mj  
 #17 'economics'/mj  
 #16 'economic model'/de  
 #15 'health economics'/de  
 #14 'economic evaluation'/de  
 #13 #1 OR #2 OR #3 OR #4 OR #5 OR #6 OR #7 OR #8 OR #9 OR #10 OR #11 OR #12  
 #12 bereave\*:de,ti,ab,kw  
 #11 hospice\*:de,ti,ab,kw  
 #10 'advanced cancer':ti,ab,kw  
 #9 'end of life':de,ti,ab,kw OR 'last year of life':de,ti,ab,kw OR 'lyol':de,ti,ab,kw OR 'life s end':de,ti,ab,kw  
 #8 (terminal\* NEAR/6 (care\* OR caring OR ill OR illness\* OR patient\*)):ti,ab,kw  
 #7 palliat\*:ti,ab,kw  
 #6 'hospice'/de  
 #5 'terminal disease'/de  
 #4 'palliative therapy'/exp  
 #3 'terminal care'/exp  
 #2 'terminally ill patient'/exp  
 #1 'palliative nursing'/de

EBM Reviews - Health Technology Assessment Database (OVID) (discontinued at the end of 2016)

1 Palliative Care/  
 2 exp Terminal Care/  
 3 terminally ill/  
 4 palliat\*.mp.  
 5 (terminal\* adj6 (care or caring or ill or illness\*)).mp.  
 6 (end of life or last year of life or lyol or life\* end).mp.  
 7 advanced cancer.mp.  
 8 hospices/  
 9 hospice\*.mp.  
 10 bereave\*.mp.  
 11 1 or 2 or 3 or 4 or 5 or 6 or 7 or 8 or 9 or 10  
 12 exp Health Care Costs/  
 13 ((health care or healthcare) adj3 cost\*).mp.  
 14 "Costs and Cost Analysis"/  
 15 Cost-Benefit Analysis/mt [Methods]  
 16 exp models, economic/  
 17 (economic\* adj3 (evaluat\* or aspect\* or health or analy\* or model\* or framework\* or framework\* or method\*)):mp.  
 18 economics.mp.  
 19 12 or 13 or 14 or 15 or 16 or 17 or 18  
 20 11 and 19  
 21 limit 20 to "all child (0 to 18 years)"  
 22 limit 20 to (dutch or english or german or spanish or french)

EBM Reviews - NHS Economic Evaluation Database (OVID) (discontinued on 31 March 2015)

1 Palliative Care/  
 2 exp Terminal Care/  
 3 terminally ill/

4 palliat\*.mp. [mp=title, text, subject heading word]  
5 (terminal\* adj6 (care or caring or ill or illness\*)).mp. [mp=title, text, subject heading word]  
6 (end of life or last year of life or lyol or life\* end).mp. [mp=title, text, subject heading word]  
7 advanced cancer.mp. [mp=title, text, subject heading word]  
8 hospices/  
9 hospice\*.mp. [mp=title, text, subject heading word]  
10 bereave\*.mp. [mp=title, text, subject heading word]  
11 1 or 2 or 3 or 4 or 5 or 6 or 7 or 8 or 9 or 10  
12 limit 11 to "all child (0 to 18 years)"  
13 limit 12 to "all adult (19 plus years)"  
14 12 not 13  
15 11 not 14  
16 limit 15 to yr="1999 - 2015"



1 **Table 4.** Characteristics of included studies

| Author                                | Year | Title                                                                                                                | Journal                                                       | Country<br>(1st author) | Study type                                | Main focus                        |                                                                             |                                    |                                   |                                      |                                        |                                |                                                                    |                                                      |
|---------------------------------------|------|----------------------------------------------------------------------------------------------------------------------|---------------------------------------------------------------|-------------------------|-------------------------------------------|-----------------------------------|-----------------------------------------------------------------------------|------------------------------------|-----------------------------------|--------------------------------------|----------------------------------------|--------------------------------|--------------------------------------------------------------------|------------------------------------------------------|
|                                       |      |                                                                                                                      |                                                               |                         |                                           | Inaccurate patient identification | Restricted generalisability due to poor geographic evidence transferability | Narrow costing perspective applied | Difficulties defining comparators | Consequences of applied time horizon | Ambiguity in the selection of outcomes | Challenged outcome measurement | Challenges regarding a reliable preference-based outcome valuation | Non-standardised measurements and valuation of costs |
| <b>Al-Janabi et al.</b> <sup>34</sup> | 2008 | What do people value when they provide unpaid care for an older person? A meta-ethnography with interview follow-up. | Social science & medicine                                     | UK                      | Measure development/<br>Qualitative study |                                   |                                                                             |                                    |                                   |                                      |                                        | X                              |                                                                    |                                                      |
| <b>Andersson et al.</b> <sup>90</sup> | 2002 | The economic burden of informal care                                                                                 | International Journal of Technology Assessment in Health Care | Sweden                  | Case study                                |                                   |                                                                             | X                                  |                                   |                                      |                                        |                                |                                                                    | X                                                    |
| <b>Antunes et al.</b> <sup>73</sup>   | 2018 | Outcome measurement-a scoping review of the literature and future developments in palliative care clinical practice  | Annals of Palliative Medicine                                 | Portugal                | Scoping review                            |                                   |                                                                             | X                                  |                                   |                                      |                                        |                                |                                                                    | X                                                    |



|                                     |      |                                                                                                                                                |                                                        |               |                                     |   |  |  |   |  |  |   |   |   |   |  |  |
|-------------------------------------|------|------------------------------------------------------------------------------------------------------------------------------------------------|--------------------------------------------------------|---------------|-------------------------------------|---|--|--|---|--|--|---|---|---|---|--|--|
| <b>Chai et al.</b> <sup>24</sup>    | 2014 | The magnitude, share and determinants of unpaid care costs for home-based palliative care service provision in Toronto, Canada                 | Health and social care in the community                | China/ Canada | Prospective cohort study            |   |  |  | x |  |  |   |   |   |   |  |  |
| <b>Coast J.</b> <sup>45</sup>       | 2014 | Strategies for the economic evaluation of end-of-life care: making a case for the capability approach                                          | Expert Review of Pharmacoeconomics & Outcomes Research | UK            | Expert review                       | x |  |  |   |  |  | x | x | x |   |  |  |
| <b>Coast et al.</b> <sup>58</sup>   | 2020 | "It is not a scientific number it is just a feeling": Populating a multi-dimensional end-of-life decision framework using deliberative methods | Health Economics                                       | UK            | Qualitative study / Focus groups    |   |  |  |   |  |  |   |   |   | x |  |  |
| <b>Coast et al.</b> <sup>46</sup>   | 2018 | Patient centered outcome measurement in health economics: beyond EQ-5D and the Quality-Adjusted Life-Year-where are we now?                    | Annals of Palliative Medicine                          | UK            | Opinion paper                       |   |  |  |   |  |  | x |   |   |   |  |  |
| <b>Costa et al.</b> <sup>78</sup>   | 2014 | The development of cancer-specific multi-attribute utility instruments from the EORTC QLQ-C30 and FACT-G                                       | Asia-Pacific Journal of Clinical Oncology              | Australia     | Development of measure              |   |  |  |   |  |  | x |   |   |   |  |  |
| <b>Davis et al.</b> <sup>79</sup>   | 2017 | Quality of life in palliative care                                                                                                             | Expert review of quality of life in cancer care        | USA           | Narrative review                    |   |  |  |   |  |  | x |   |   |   |  |  |
| <b>Davis et al.</b> <sup>67</sup>   | 2002 | The business of palliative medicine--Part 2: The economics of acute inpatient palliative medicine                                              | American Journal of Hospice & Palliative Medicine      | USA           | Letter                              | x |  |  |   |  |  |   |   |   |   |  |  |
| <b>Davis et al.</b> <sup>68</sup>   | 2004 | End-of-life care costs. Journal of Palliative Medicine                                                                                         | Journal of Palliative Medicine                         | USA           | Review/Discussion paper/perspective | x |  |  |   |  |  |   |   |   |   |  |  |
| <b>Davison et al.</b> <sup>95</sup> | 2008 | Methodological considerations for end-of-life research in patients with chronic kidney disease                                                 | Methods and science in nephrology                      | Canada        | Review/Discussion paper/perspective |   |  |  | x |  |  |   |   |   |   |  |  |
| <b>Douglas et al.</b> <sup>37</sup> | 2005 | A new approach to eliciting patients' preferences for palliative day care: the choice experiment method                                        | Journal of Pain & Symptom Management                   | UK            | Choice experiment                   |   |  |  |   |  |  | x |   | x |   |  |  |

|                                       |      |                                                                                                                                                                       |                                                 |           |                                                |   |   |   |  |  |  |  |   |  |  |  |  |   |
|---------------------------------------|------|-----------------------------------------------------------------------------------------------------------------------------------------------------------------------|-------------------------------------------------|-----------|------------------------------------------------|---|---|---|--|--|--|--|---|--|--|--|--|---|
| <b>Dumont et al.</b> <sup>91</sup>    | 2010 | Measurement challenges of informal caregiving: A novel measurement method applied to a cohort of palliative care patients                                             | Social Science & Medicine                       | Canada    | Methodological paper                           |   |   |   |  |  |  |  |   |  |  |  |  | x |
| <b>Dzingina et al.</b> <sup>39</sup>  | 2017 | Does the EQ-5D capture the concerns measured by the Palliative care Outcome Scale? Mapping the Palliative care Outcome Scale onto the EQ-5D using statistical methods | Palliative Medicine                             | UK        | Cross-sectional study                          |   |   |   |  |  |  |  | x |  |  |  |  |   |
| <b>Dzingina et al.</b> <sup>38</sup>  | 2017 | Development of a Patient-Reported Palliative Care-Specific Health Classification System: The POS-E                                                                    | The Patient: Patient-Centered Outcomes Research | UK        | Development of measure                         |   |   |   |  |  |  |  | x |  |  |  |  |   |
| <b>Eagar et al.</b> <sup>99</sup>     | 2004 | An Australian casemix classification for palliative care: technical development and results                                                                           | Palliative Medicine                             | Australia | Development of case-mix classification         | x |   |   |  |  |  |  |   |  |  |  |  |   |
| <b>Eckermann S.</b> <sup>80</sup>     | 2017 | Health economics from theory to practice                                                                                                                              | Book                                            | Australia |                                                |   |   |   |  |  |  |  | x |  |  |  |  |   |
| <b>Engelberg et al.</b> <sup>69</sup> | 2006 | Measuring the quality of dying and death: methodological considerations and recent findings                                                                           | Current Opinion in Critical Care                | USA       | Review/Discussion paper/perspective            | x |   |   |  |  |  |  |   |  |  |  |  |   |
| <b>Evans et al.</b> <sup>26</sup>     | 2013 | "Best practice" in developing and evaluating palliative and end-of-life care services: A meta-synthesis of research methods for the MORECare project                  | Palliative Medicine                             | UK        | Systematic review                              |   |   | x |  |  |  |  | x |  |  |  |  | x |
| <b>Gardiner et al.</b> <sup>52</sup>  | 2014 | Exploring the financial impact of caring for family members receiving palliative and end-of-life care: a systematic review of the literature                          | Palliative Medicine                             | UK        | Systematic review                              |   | x | x |  |  |  |  |   |  |  |  |  | x |
| <b>Gardiner et al.</b> <sup>40</sup>  | 2016 | Methodological considerations for researching the financial costs of family caregiving within a palliative care context                                               | BMJ Supportive & Palliative Care                | UK        | Qualitative study (semi-structured interviews) |   | x |   |  |  |  |  | x |  |  |  |  | x |





|                                                |      |                                                                                                                                       |                                        |           |                                     |   |   |   |   |  |   |  |   |  |   |   |
|------------------------------------------------|------|---------------------------------------------------------------------------------------------------------------------------------------|----------------------------------------|-----------|-------------------------------------|---|---|---|---|--|---|--|---|--|---|---|
| <b>May et al.</b> <sup>17</sup>                | 2014 | Economic impact of hospital inpatient palliative care consultation: Review of current evidence and directions for future research     | Palliative Care Review                 | Ireland   | Meta-review                         |   |   | x |   |  | x |  |   |  | x |   |
| <b>May et al.</b> <sup>92</sup>                | 2016 | Analyzing the Impact of Palliative Care Interventions on Cost of Hospitalization: Practical Guidance for Choice of Dependent Variable | Journal of Pain & Symptom Management   | Ireland   | Simulation study                    |   |   |   |   |  |   |  |   |  |   | x |
| <b>May et al.</b> <sup>83</sup>                | 2017 | Current state of the economics of palliative and end-of-life care: A clinical view                                                    | Palliative Medicine                    | Ireland   | Review/Discussion paper/perspective |   |   |   |   |  | x |  |   |  |   |   |
| <b>May et al.</b> <sup>94</sup>                | 2018 | Economic outcomes in palliative and end-of-life care: current state of affairs                                                        | Annals of Palliative Medicine          | Ireland   | Review/Discussion paper/perspective | x |   | x |   |  |   |  | x |  |   |   |
| <b>May et al.</b> <sup>97</sup>                | 2020 | Economics of palliative care for cancer: interpreting current evidence, mapping future priorities for research                        | Journal of Clinical Oncology           | Ireland   | Review                              | x |   |   | x |  |   |  | x |  |   |   |
| <b>McCaffrey et al.</b> <sup>84</sup>          | 2009 | Measuring impacts of value to patients is crucial when evaluating palliative care                                                     | Journal of Pain & Symptom Management   | Australia | Letter                              |   |   |   |   |  | x |  |   |  | x |   |
| <b>McCaffrey et al.</b> <sup>96</sup>          | 2015 | Bringing the economic cost of informal caregiving into focus                                                                          | Palliative Medicine                    | Australia | Editorial                           | x | x | x |   |  |   |  |   |  |   |   |
| <b>McCaffrey &amp; Eckermann</b> <sup>21</sup> | 2018 | Raise the Bar, Not the Threshold Value: Meeting Patient Preferences for Palliative and End-of-Life Care                               | Pharmacoecoon Open                     | Australia | Editorial                           |   |   |   |   |  | x |  |   |  |   |   |
| <b>Mosoiu et al.</b> <sup>93</sup>             | 2014 | Developing a costing framework for palliative care services                                                                           | Journal of pain and symptom management | Romania   | Methodological paper                |   |   |   |   |  |   |  |   |  |   | x |
| <b>Murtagh et al.</b> <sup>47</sup>            | 2013 | Capturing activity, costs, and outcomes: The challenges to be overcome for successful economic evaluation in palliative care          | Progress in Palliative Care            | UK        | Methodological paper                |   |   |   |   |  |   |  | x |  |   | x |
| <b>Myring et al.</b> <sup>48</sup>             | 2022 | An analysis of the construct validity and responsiveness of the ICECAP-SCM capability                                                 | BMC Palliative Care                    | UK        | Construct validity study            |   |   |   |   |  |   |  | x |  |   |   |
